# Supplementary material for: Comprehensive Immune Monitoring of Clinical Trials to Advance Human Immunotherapy
Source: PubMed Central journal article supplement (PMC6656694; doi:10.1016/j.celrep.2019.06.049), 2019-07-16
Supplement: mmc1.pdf [file mmc1.pdf]

**Cell Reports, Volume 28**

## **Supplemental Information**

### **Comprehensive Immune Monitoring of Clinical Trials to Advance Human Immunotherapy**

**Felix J. Hartmann, Joel Babbord, Pier Federico Gherardini, El-Ad D. Amir, Kyle Jones, Bitu Sahaf, Diana M. Marquez, Peter Krutzik, Erika O'Donnell, Natalia Sigal, Holden T. Maecker, Everett Meyer, Matthew H. Spitzer, and Sean C. Bendall**

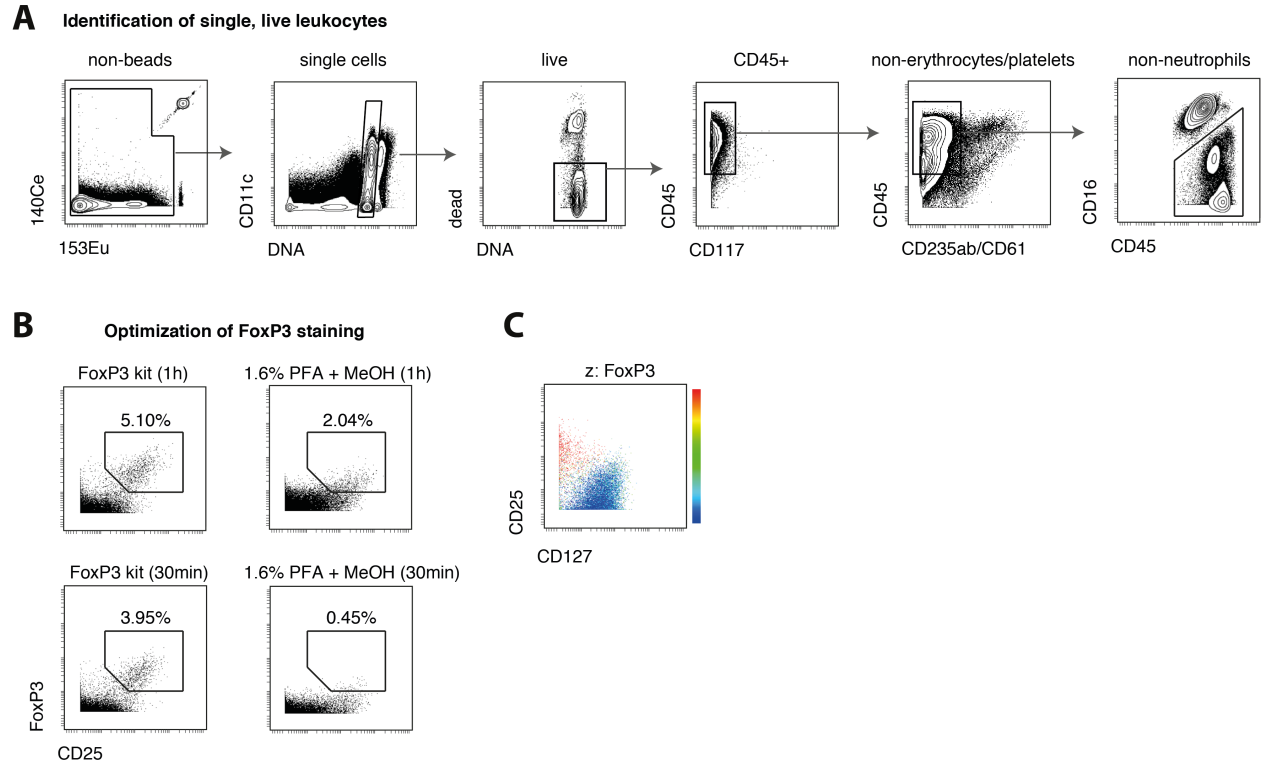

**Figure S1. Identification of single, live leukocytes and optimization of FoxP3 staining. Related to Figure 2.**

PBMCs or whole blood of healthy donors was stained with the reference panel as outlined in Table S1. (A) Serial gates used to identify single, live cells. Firstly, remaining beads are excluded and next, DNA positive events are identified. CD11c is used to discriminate duplets from monocyte populations which show higher DNA staining. Next, cisplatin-positive (dead) cells are excluded and CD45<sup>+</sup> (non-mast cells) are selected. Potentially remaining erythrocytes, platelets and neutrophils are excluded. Representative examples shown here may be from different samples to demonstrate the utility of each gating step. (B) PBMCs from healthy subjects were first stained for surface antigen and then fixed using different fixation schemes. For the FoxP3 fixation permeabilization kit (left), cells were fixed with 1x fixation buffer for 1 h at RT. Intracellular staining was performed for 1 h (top) or 30 min (bottom) in 1x permeabilization buffer. Alternatively, cells were fixed with 1.6% PFA (right) for 10 min at RT and permeabilized with 100% cold MeOH for 10 min on ice. Cells were then stained intracellularly for 1 h (top) or 30 min (bottom) in CSM. Shown are CD4<sup>+</sup> T cells. (C) Cells are colored by FoxP3 intensity as well as CD127 and CD25 which can be used to identify Treg cells.

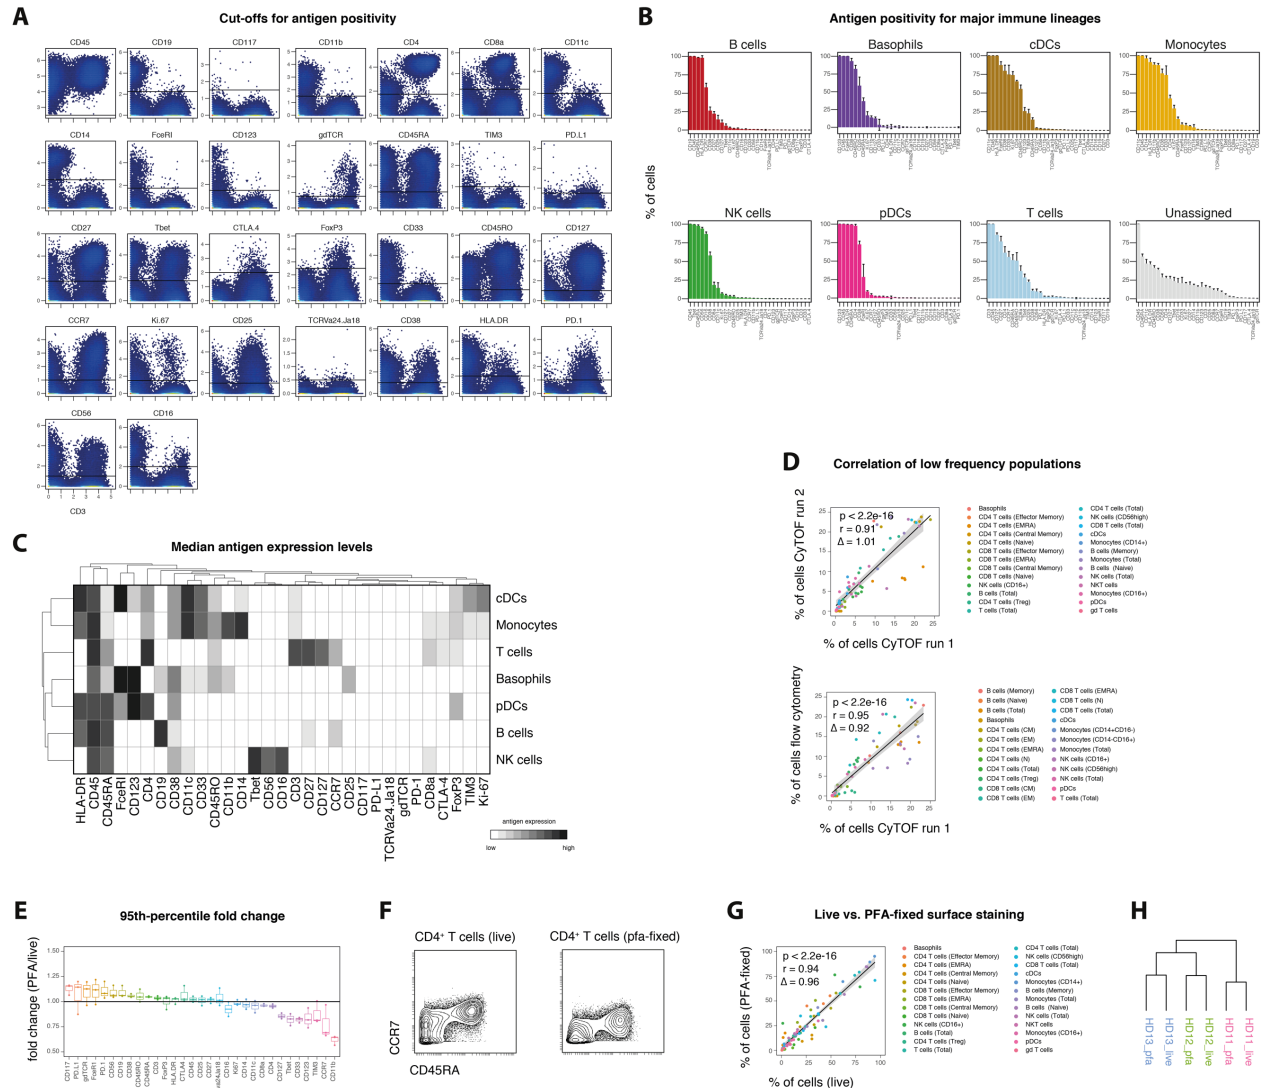

**Figure S2. Robustness of immune cell lineage identification. Related to Figure 3.** PBMCs from healthy donors ( $n = 5$ ) were stained with the reference panel and analyzed by mass cytometry. Cells were pre-gated as single, live,  $CD45^+$ , non-neutrophils. (A) Cutoffs (black horizontal lines) used to determine positivity of antigen expression. (B) Median percentage of cells in each immune cell lineage which is positive for the indicated antigen based on the cutoffs as in A. Error bars represent s.e.m. (C) Median antigen expression levels on manually gated immune cell lineages. (D) Immune cell frequencies (only populations below 25% of total cells are shown) determined by two different CyTOF analyses (top) or by CyTOF and flow cytometry (bottom). Frequencies of immune lineages were determined through serial gating. Linear regression line is shown in black with the 95% confidence intervals (CI, shaded). Coefficients, p-values and slope  $\Delta$  were calculated based on data from all donors. (E-H) PBMCs from healthy donors ( $n = 3$ ) were stained directly with surface antibodies or fixed with 1.6% PFA for 10 min at RT before

surface staining. (E) To assess the influence of PFA-fixation on the maximum dynamic range, we first calculated the 95<sup>th</sup> percentile of each marker and subsequently calculated the respective fold change (FC) for all markers. The black horizontal line represents FC = 1. Boxplots depict the interquartile range (IQR) with a horizontal line representing the median. Whiskers extend to the farthest data point within a maximum of 1.5x IQR. Points represent individual samples. (F) Exemplary biaxial plots showing reduced CCR7 and comparable CD45RA staining intensities on fixed T cell populations. (G) Frequencies of immune cell populations were determined through serial gating and plotted against each other. Linear regression line is shown in black with the 95% confidence intervals (CI) shaded. Coefficients, p-values and slope  $\Delta$  were calculated based on data from all donors. (H) Hierarchical clustering of unfixed or fixed samples based on frequencies as in G.

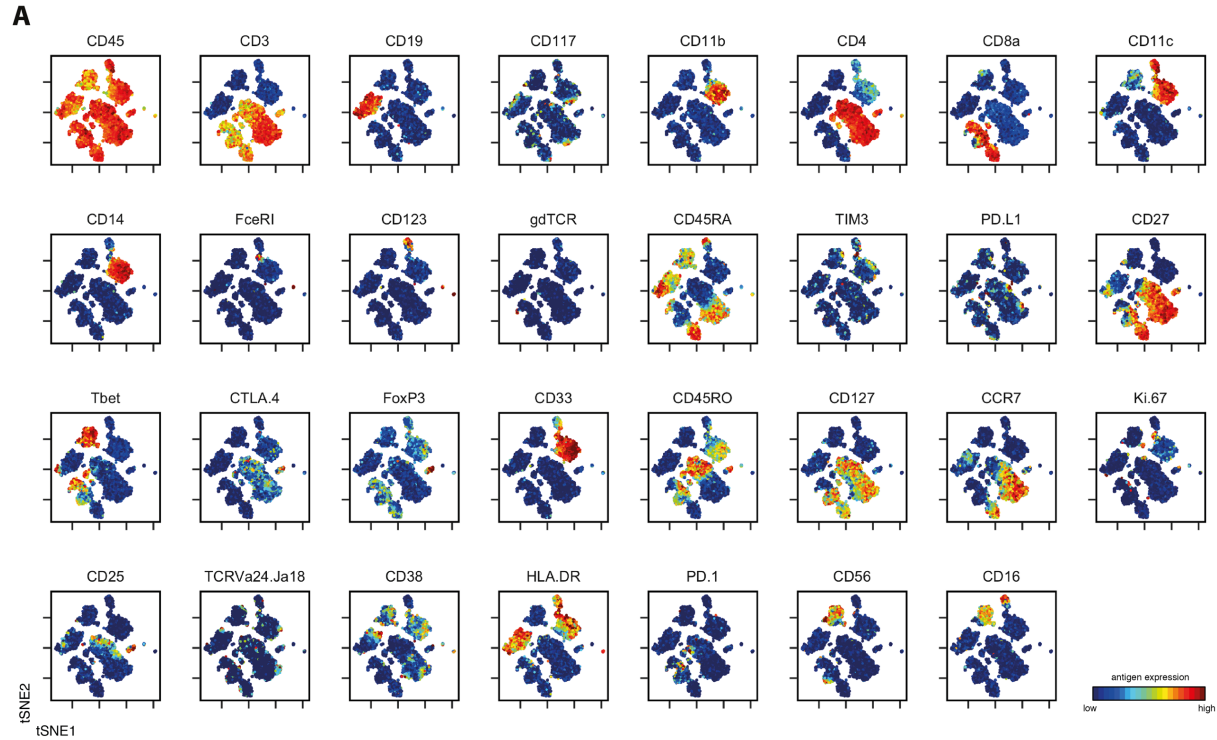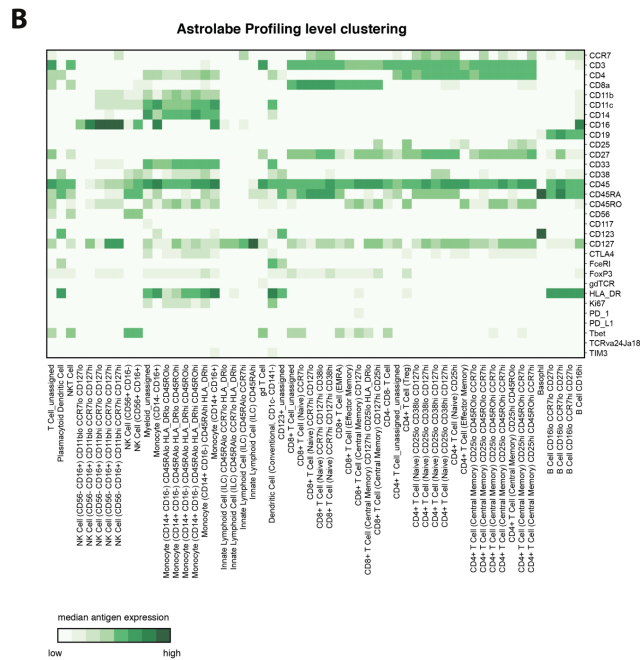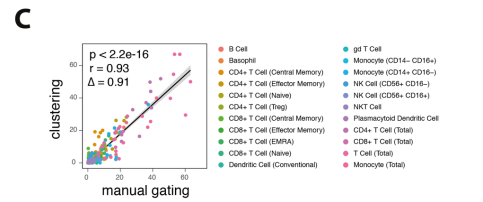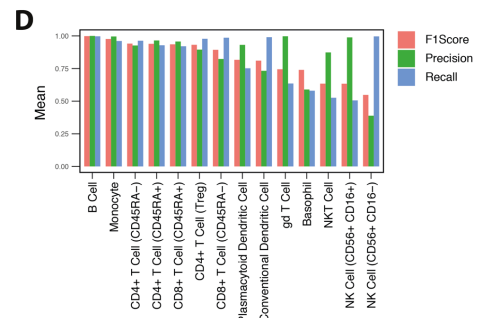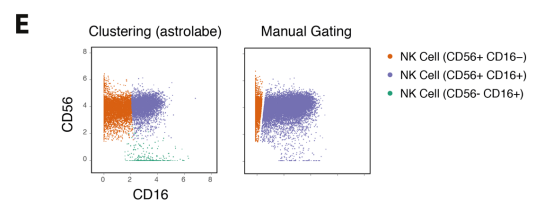

**Figure S3. Automated profiling of immune cell populations. Related to Figure 4.** (A) tSNE visualizations were produced from randomly subsampled data (20'000 cells) of five healthy donors. Indicated antigen expression levels are overlaid as a color dimension. (B) PBMC data from healthy donors was clustered and automatically annotated

using the Astrolabe platform. Shown are median expression levels of all antigens across all clusters on the Profiling level. (C) Frequencies of immune cell populations determined by manual gating or through Astrolabe clustering. Linear regression line is shown in black with the 95% confidence intervals (CI) shaded. Coefficients, p-values and slope  $\Delta$  were calculated based on data from all donors. (D) Mean precision, recall and F1 score between manual lineage assignments and Astrolabe-based clustering across different populations. (E) Example of differential thresholds employed in clustering (left) and manual gating (right).

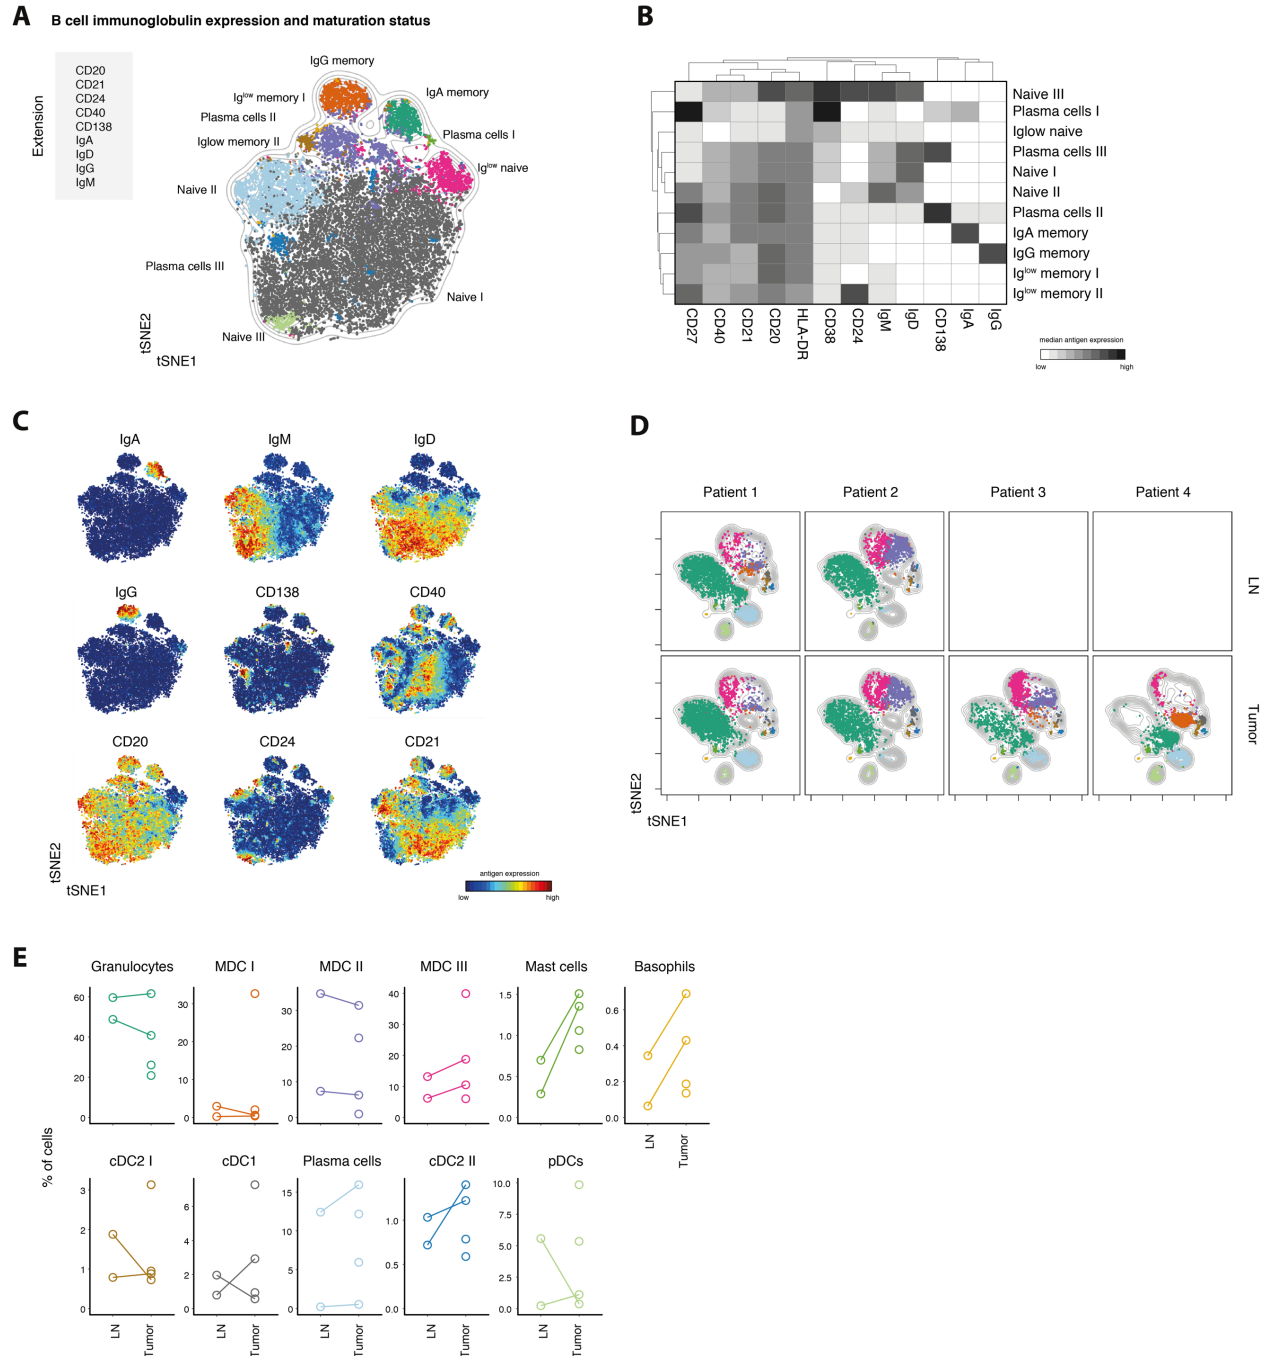

**Figure S4. Exploration of heterogeneous populations through panel extensions. Related to Figure 6. (A)**

Antibodies targeting additional antigens of interest (left) were conjugated to non-occupied heavy metal isotopes.

PBMCs from healthy donors (see Table S2) were stained with these antibodies in combination with the reference

set. Data was pre-gated to exclude T cells and NK cells. To create a tSNE overview, data from all samples was

randomly subsampled to 21'000 cells with equal contribution from all samples. Cells are colored by their

FlowSOM-based cluster-assignment. Grey lines indicate the density distribution of the tSNE map. (B) Cluster-based

median expression levels for all population relevant antigens used in the tSNE and FlowSOM analysis. (C) Protein expression levels of all additional antigens are overlaid as a color-dimension onto the tSNE map. (D-E) Antibodies targeting additional myeloid antigens were conjugated to non-occupied heavy metal isotopes. Cells from lymph node biopsies (n = 2) and tumor biopsies (n = 4) of patients with head and neck carcinoma (see Table S2) were stained with these antibodies in combination with the reference set. (D) tSNE overview with colors denoting FlowSOM-cluster assignments stratified by sample. (E) Frequencies of FlowSOM-based clusters as in D in all samples. Lines connect different tissues of the same patients.



**Table S1. Reference panel of anti-human antibodies for mass cytometry. Related to Figure1.**

| Isotope | Element | Marker         | Clone          | Staining step | Dilution factor | Catalogue number |
|---------|---------|----------------|----------------|---------------|-----------------|------------------|
| 89      | Y       | CD45           | H130           | surface       | 100             | 3089003B         |
| 102     | Pd      |                |                |               |                 |                  |
| 104     | Pd      |                |                |               |                 |                  |
| 105     | Pd      |                |                |               |                 |                  |
| 106     | Pd      |                |                |               |                 |                  |
| 108     | Pd      |                |                |               |                 |                  |
| 110     | Pd      |                |                |               |                 |                  |
| 113     | In      |                |                |               |                 |                  |
| 115     | In      |                |                |               |                 |                  |
| 139     | La      | CD235ab/CD61   | HIR2/VI-PL2    | surface       |                 | custom           |
| 140     | Ce      |                |                |               |                 |                  |
| 141     | Pr      | CD3            | UCHT1          | surface       |                 | custom           |
| 142     | Nd      | CD19           | HIB19          | surface       | 100             | 3142001B         |
| 143     | Nd      | CD117          | 104D2          | surface       | 100             | 3143001B         |
| 144     | Nd      | CD11b          | IRCF44         | surface       | 400             | 3144001B         |
| 145     | Nd      | CD4            | RPA-T4         | surface       | 200             | 3145001B         |
| 146     | Nd      | CD8a           | RPA-T8         | surface       | 1600            | 3146001B         |
| 147     | Sm      | CD11c          | BU15           | surface       | 200             | 3147008B         |
| 148     | Nd      | CD14           | RMO52          | surface       | 1600            | 3148010B         |
| 149     | Sm      |                |                |               |                 |                  |
| 150     | Nd      | FceRI          | AER-37 (CRA-1) | surface       | 100             | 3150027B         |
| 151     | Eu      | CD123          | 6H6            | surface       | 100             | 3151001B         |
| 152     | Sm      | gdTCR          | 11F2           | surface       | 100             | 3152008B         |
| 153     | Eu      | CD45RA         | HI100          | surface       | 100             | 3153001B         |
| 154     | Sm      | TIM3           | F38-2E2        | surface       | 100             | 3154010B         |
| 155     | Gd      |                |                |               |                 |                  |
| 156     | Gd      | PD-L1 (CD274)  | 29E.2A3        | surface       | 100             | 3156026B         |
| 157     | Gd      |                |                |               |                 |                  |
| 158     | Gd      | CD27           | L128           | surface       | 400             | 3158010B         |
| 159     | Tb      |                |                |               |                 |                  |
| 160     | Gd      | Tbet           | 4B10           | intracellular | 100             | 3160010B         |
| 161     | Dy      | CD152 (CTLA-4) | 14D3           | intracellular | 800             | 3161004B         |
| 162     | Dy      | FoxP3          | PCH101         | intracellular | 400             | 3162011A         |
| 163     | Dy      | CD33           | WM53           | surface       | 100             | 3163023B         |
| 164     | Dy      | CD45RO         | UCHL1          | surface       | 200             | 3164007B         |
| 165     | Ho      | CD127          | A019D5         | surface       | 100             | 3165008B         |
| 166     | Er      |                |                |               |                 |                  |
| 167     | Er      | CCR7 (CD197)   | G043H7         | surface       | 100             | 3167009A         |
| 168     | Er      | Ki-67          | B56            | intracellular | 400             | 3168007B         |
| 169     | Tm      | CD25           | 2A3            | surface       | 100             | 3169003B         |
| 170     | Er      | TCR Va24-Ja18  | 6B11           | intracellular | 100             | 3170015B         |
| 171     | Yb      |                |                |               |                 |                  |
| 172     | Yb      | CD38           | HIT2           | surface       | 400             | 3172007B         |
| 173     | Yb      |                |                |               |                 |                  |
| 174     | Yb      | HLA-DR         | L243           | surface       | 100             | 3174001B         |
| 175     | Lu      | PD-1           | EH12.2H7       | surface       | 100             | 3175008B         |
| 176     | Yb      | CD56           | NCAM16.2       | surface       | 100             | 3176008B         |
| 191     | Ir      | DNA            |                |               |                 |                  |
| 191     | Ir      | DNA            |                |               |                 |                  |
| 194     | Pt      |                |                |               |                 |                  |
| 195     | Pt      | Live/dead      |                |               |                 |                  |
| 196     | Pt      |                |                |               |                 |                  |
| 198     | Pt      |                |                |               |                 |                  |
| 209     | Bi      | CD16           | 3G8            | surface       | 100             | 3209002B         |

**Table S2. Donor characteristics. Related to Figure 3, Figure 4, Figure 5 and Figure 6.**

| Donor ID | Tissues analyzed | Diagnosis     | Age | Sex |
|----------|------------------|---------------|-----|-----|
| HD01     | PMBC             | Healthy Donor | NA  | NA  |
| HD02     | PMBC             | Healthy Donor | NA  | NA  |
| HD03     | PMBC             | Healthy Donor | NA  | NA  |
| HD04     | PMBC             | Healthy Donor | NA  | NA  |
| HD05     | PMBC             | Healthy Donor | NA  | NA  |
| HD06     | PMBC             | Healthy Donor | NA  | NA  |
| HD07     | PMBC             | Healthy Donor | 35  | M   |
| HD08     | PMBC             | Healthy Donor | 46  | F   |
| HD09     | PMBC             | Healthy Donor | 41  | F   |
| HD10     | PMBC             | Healthy Donor | 51  | F   |
| HD11     | PMBC             | Healthy Donor | NA  | NA  |
| HD12     | PMBC             | Healthy Donor | NA  | NA  |
| HD13     | PMBC             | Healthy Donor | NA  | NA  |

| Donor ID | Tissues analyzed | Diagnosis              | Age | Sex | Tumor site     | Tumor     | p16 status             | Locoregional LN Met | AJCC Stage |
|----------|------------------|------------------------|-----|-----|----------------|-----------|------------------------|---------------------|------------|
| T01      | Tumor            | SCC                    | 57  | M   | Tonsil         | Primary   | Positive               | Yes                 | pT2N2b     |
| T02      | Tumor, Met       | SCC (poor)             | 78  | F   | Tongue         | Recurrent | NA                     | Yes                 | pT3N2c     |
| T03      | Tumor, Met       | SCC (moderate)         | 83  | F   | Gingiva        | Primary   | NA                     | Yes                 | pT4N2b     |
| T04      | Tumor            | SCC (moderate)         | 69  | F   | Floor of mouth | Primary   | NA                     | Yes                 | pT4N2c     |
| T05      | Tumor            | SCC (basaloid)         | 55  | M   | Supraglottis   | Recurrent | NA, prior was positive | NA                  | pT4N1x     |
| T06      | Tumor            | SCC (moderate to poor) | 70  | M   | Ventral tongue | Primary   | NA                     | Yes                 | pT2N1      |
| T07      | Tumor            | Waldenstrom Tumor      | 76  | M   | Parotid Gland  | Primary   | NA                     | No                  | NA         |

| Donor ID | Tissues analyzed | Diagnosis        | Age | Sex | gVHD                        | gVHD onset | gVHD          | SAE                         | CMV/DIR | Conditioning  | gVHD Ppx        | Grat. type     | Sampling       |
|----------|------------------|------------------|-----|-----|-----------------------------|------------|---------------|-----------------------------|---------|---------------|-----------------|----------------|----------------|
| BM101    | PMBC             | AML              | 58  | F   | None                        | NA         | None          | E. coli, bacteremia         | +/+     | Bu/Cy         | Tacrolimus, MTX | PBMSC          | day 30, day 90 |
| BM102    | PMBC             | AML              | 57  | M   | None                        | NA         | None          | Coccioidis infection, CMV   | +/+     | Bu/Cy         | Tacrolimus, MTX | PBMSC          | day 30, day 90 |
| BM103    | PMBC             | B. AML           | 39  | F   | None                        | NA         | None          | Tetraditis bacteremia       | +/+     | TBI/VF-16     | Tacrolimus, MTX | PBMSC          | day 30, day 90 |
| BM104    | PMBC             | B. AML           | 39  | F   | None                        | NA         | None          | Osteofitum                  | +/+     | Bu/Cy         | Tacrolimus, MTX | PBMSC          | day 30, day 90 |
| BM105    | PMBC             | AML              | 58  | F   | None                        | NA         | None          | None                        | +/+     | Bu/Cy         | Tacrolimus, MTX | PBMSC          | day 30, day 90 |
| BM106    | PMBC             | FLT3+ AML        | 42  | M   | None                        | NA         | None          | Mild VOD                    | +/+     | Bu/Cy         | Tacrolimus, MTX | CD34/Treg/Tcon | day 30, day 90 |
| BM107    | PMBC             | ETP-ALL          | 34  | M   | None                        | NA         | None          | Hepes labialis              | +/+     | TBI/Cy/VF-16  | Tacrolimus      | CD34/Treg/Tcon | day 30, day 90 |
| BM108    | PMBC             | ALL              | 20  | M   | None                        | NA         | None          | Acute on chronic hepatitis  | +/+     | Bu/Cy         | Tacrolimus      | CD34/Treg/Tcon | day 30         |
| BM109    | PMBC             | CML blast crisis | 54  | M   | None                        | NA         | None          | Coronavirus URI             | +/+     | Bu/Cy         | Tacrolimus      | CD34/Treg/Tcon | day 30, day 90 |
| BM110    | PMBC             | AML              | 53  | M   | None                        | NA         | None          | Unspecified transaminitis   | +/+     | Bu/Cy         | Tacrolimus      | CD34/Treg/Tcon | day 30, day 90 |
| BM111    | PMBC             | MF               | 53  | M   | None                        | NA         | None          | Shingles                    | +/+     | Bu/Cy         | Tacrolimus      | CD34/Treg/Tcon | day 30, day 90 |
| BM112    | PMBC             | Relapsing NHL    | 56  | M   | None                        | NA         | None          | CMV, Aspergillus            | +/+     | BCNU/VF-16/Cy | Sirolimus       | CD34/Treg/Tcon | day 30, day 90 |
| BM113    | PMBC             | Relapsing NHL    | 61  | F   | None                        | NA         | None          | CMV, Aspergillus            | +/+     | BCNU/VF-16/Cy | Sirolimus       | CD34/Treg/Tcon | day 30, day 90 |
| BM114    | PMBC             | Gamma delta NHL  | 45  | F   | Yes, grade 3 skin and liver | day 22     | Mild, day 474 | Gran negative bacteremia    | +/+     | BCNU/VF-16/Cy | None            | CD34/Treg/Tcon | day 30, day 90 |
| BM115    | PMBC             | AML              | 51  | M   | Yes, grade 1 skin           | day 24     | None          | Acute diverticulitis, IHHV6 | +/+     | TBI/Cy/VF-16  | None            | CD34/Treg/Tcon | day 30, day 90 |

**Table S3. Extension panels. Related to Figure 6.**

**B cell immunoglobulin expression and maturation status**

| <b>Isotope</b> | <b>Element</b> | <b>Marker</b> | <b>Clone</b> | <b>Staining step</b> |
|----------------|----------------|---------------|--------------|----------------------|
| 113            | In             | CD40          | 5C3          | surface              |
| 115            | In             | CD20          | 2H7          | surface              |
| 140            | Ce             | IgM           | G20-127      | surface              |
| 149            | Sm             | IgA           | IS11-8E10    | surface              |
| 155            | Gd             | IgD           | IA6-2        | surface              |
| 157            | Gd             | CD138         | DL-101       | surface              |
| 159            | Tb             | IgG           | M1310G05     | surface              |
| 166            | Er             | CD24          | ML5          | surface              |
| 171            | Yb             | CD21          | LT21         | surface              |
| 173            | Yb             | CD40L         | 24-31        | surface              |

**Myeloid cell diversity across multiple tissues**

| <b>Isotope</b> | <b>Element</b> | <b>Marker</b> | <b>Clone</b> | <b>Staining step</b> |
|----------------|----------------|---------------|--------------|----------------------|
| 113            | In             | CD66cd        | YTH71.3      | surface              |
| 115            | In             | CD7           | M-T701       | surface              |
| 140            | Ce             | CD86          | IT2.2        | surface              |
| 149            | Sm             | CD1c          | L161         | surface              |
| 155            | Gd             | CD64          | 10.1         | surface              |
| 157            | Gd             | CD206         | 15-2         | surface              |
| 159            | Tb             | 2B4           | M2B4         | surface              |
| 164            | Dy             | CD172ab       | SE5A5        | surface              |
| 166            | Er             | CD141         | 1A4          | surface              |
| 171            | Yb             | CD40          | 5C3          | surface              |
| 173            | Yb             | CCR2          | K036C2       | surface              |
